# Supplementary material for: What can we see from the road? Applications of a cumulative viewshed analysis on a US state highway network
Source: Copernicus journal article supplement (doi:10.5194/gh-77-165-2022), 2022-05-04
Supplement: Supplementary file 1 [file gh-77-165-2022-supplement.zip]

Archive with 2 entries (2 files):
- gh-77-165-2022-supplement-title-page.pdf
- make_viewsheds_gdal_code_share.py
