# Supplementary material for: What can we see from the road? Applications of a cumulative viewshed analysis on a US state highway network
Source: Copernicus journal article supplement (doi:10.5194/gh-77-165-2022), 2022-05-04
Supplement: Supplementary file 1 [file gh-77-165-2022-supplement.zip › gh-77-165-2022-supplement-title-page.pdf]

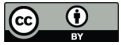

*Supplement of*

**What can we see from the road? Applications of a cumulative viewshed analysis on a US state highway network**

**Sterling D. Quinn**

*Correspondence to:* Sterling D. Quinn ([sterling.quinn@cwu.edu](mailto:sterling.quinn@cwu.edu))

- [gh-77-165-2022-supplement-title-page.pdf](#)
- [make\\_viewsheds\\_gdal\\_code\\_share.py](#)

The copyright of individual parts of the supplement might differ from the article licence.
